# Supplementary material
Source: Springer Nature journal article supplement (https://www.springermedizin.de/resource/supplementary/12985_2012_2126_MOESM10_ESM.pdf/9606092)

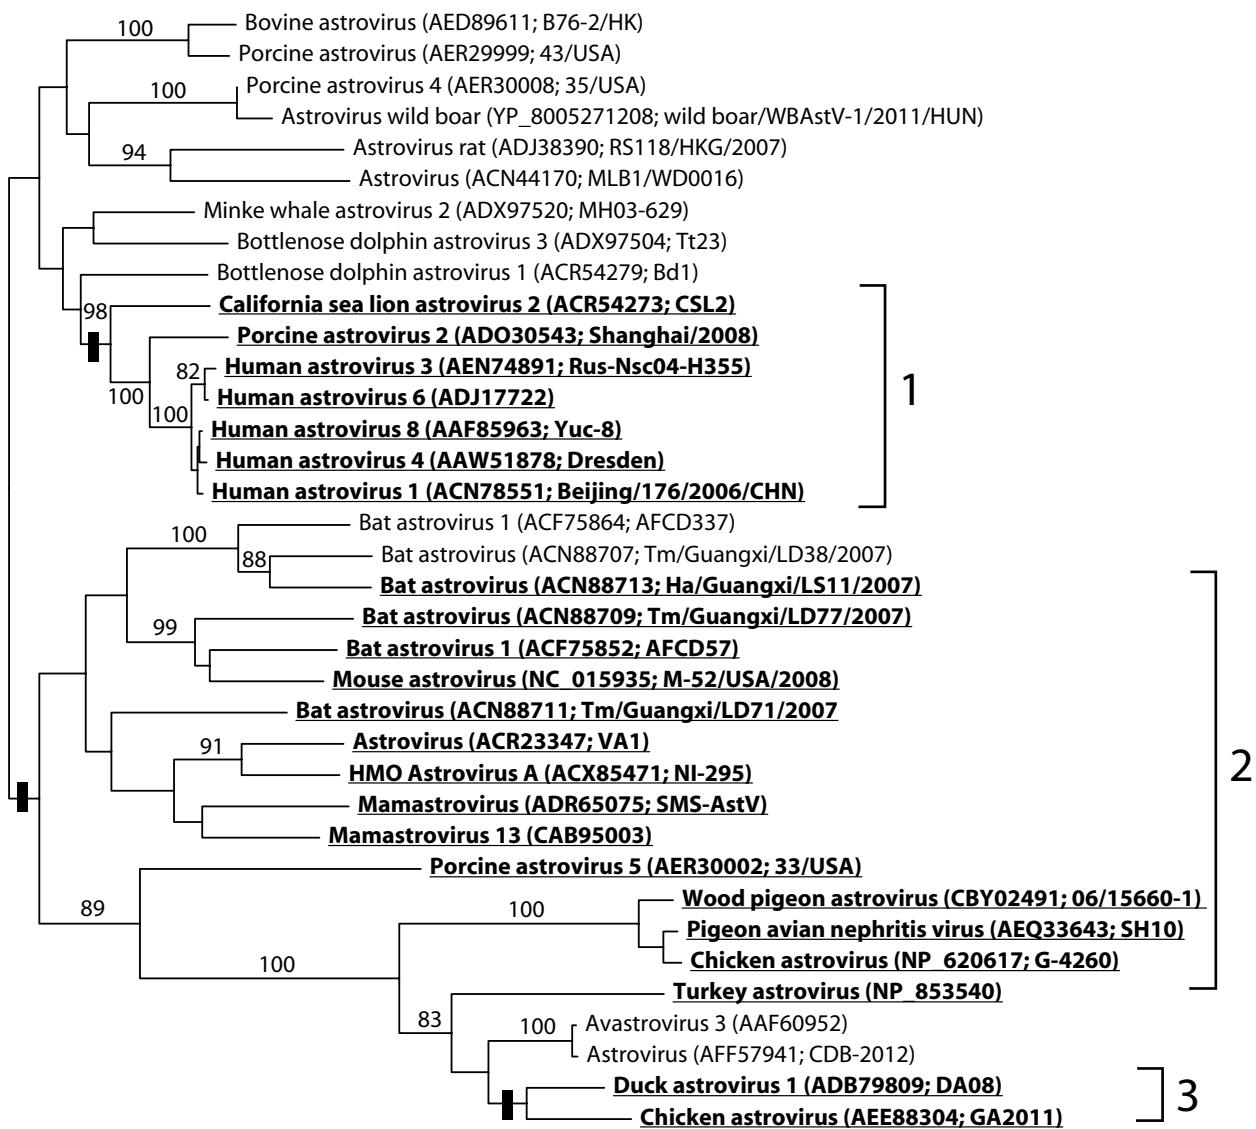

| rank | tree | $\Delta \ln$ | AU       | np       | bp | pp        | kh | sh | wkh | wsh | constraint | # gains |
|------|------|--------------|----------|----------|----|-----------|----|----|-----|-----|------------|---------|
| 1    | 1    | -231.2       | 1        | 1        | 1  | 1         | 1  | 1  | 1   | 1   | none       | 2-3     |
| 5    | 2    | 392.3        | 3.00E-66 | 1.00E-20 | 0  | 4.00E-171 | 0  | 0  | 0   | 0   | (1,2,3)    | 1       |
| 4    | 3    | 347.1        | 5.00E-51 | 2.00E-17 | 0  | 2.00E-151 | 0  | 0  | 0   | 0   | (1,2)      | 1-2     |
| 2    | 4    | 231.2        | 8.00E-73 | 9.00E-23 | 0  | 4.00E-101 | 0  | 0  | 0   | 0   | (1,3)      | 2       |
| 3    | 5    | 336.9        | 6.00E-05 | 1.00E-05 | 0  | 5.00E-147 | 0  | 0  | 0   | 0   | (2,3)      | 2       |

Supplement: MOESM10 [file 9606092]
